# Supplementary material for: Study of ferro- and anti-ferroelectric polar order in mesophases exhibited by bent-core mesogens
Source: Royal Society of Chemistry journal article supplement (doi:10.1039/d0ma00678e), 2020-01-01
Supplement: d0ma00678e1.pdf [file d0ma00678e1.pdf]

Supporting Information

## Study of ferro- and anti- ferroelectric polar order in mesophases exhibited by bent-core mesogens

Susanta Chakraborty,<sup>a</sup> Malay Kumar Das,<sup>\*a</sup> Christina Keith<sup>b</sup> and Carsten Tschierske<sup>b</sup>

<sup>a</sup> Department of Physics, North Bengal University, Siliguri-734 013, India

<sup>b</sup> Martin-Luther-Universität Halle-Wittenberg, Institut für Chemie, Physikalische Chemie, Halle, Germany

E-mail: [mkdnbu@yahoo.com](mailto:mkdnbu@yahoo.com)

### 1. Dielectric spectroscopy calculations

In order to understand the nature of the dielectric relaxation modes, the frequency-dependent dielectric loss  $\varepsilon''(f)$  curves have been fitted by Havriliak-Negami (H-N) fit function with an additional term standing for the low-frequency conductivity contribution as follows:

$$\varepsilon'' = \frac{\sigma_0}{(2\pi f)^S} + \sum_{k=1}^N \frac{\delta\varepsilon_k \sin(\beta\theta)}{[1 + (2\pi f \tau_k)^{2\alpha_k} + 2(2\pi f \tau_k)^{\alpha_k} \cos(\alpha_k \pi / 2)]^{\beta/2}} \quad (1)$$

$$\text{with } \theta = \tan^{-1} \left[ \frac{(2\pi f \tau_k)^{\alpha_k} \sin(\alpha_k \pi / 2)}{1 + (2\pi f \tau_k)^{\alpha_k} \cos(\alpha_k \pi / 2)} \right]$$

where  $\delta\varepsilon_k$  is the dielectric strength,  $\varepsilon_\infty$  is the high-frequency limit of the permittivity,  $\tau_k (= 1/2\pi f_k)$  is the relaxation time,  $f_k$  is the corresponding relaxation frequency,  $\alpha_k$  and  $\beta_k$  are the shape parameters (can be between 0 and 1) describing the symmetric and non-symmetric broadness of dielectric dispersion curve, respectively and  $k$  is the number of relaxation processes. However,  $\sigma_0$  is related to the DC conductivity and  $S$  is a fitting parameter responsible for the slope of the conductivity.

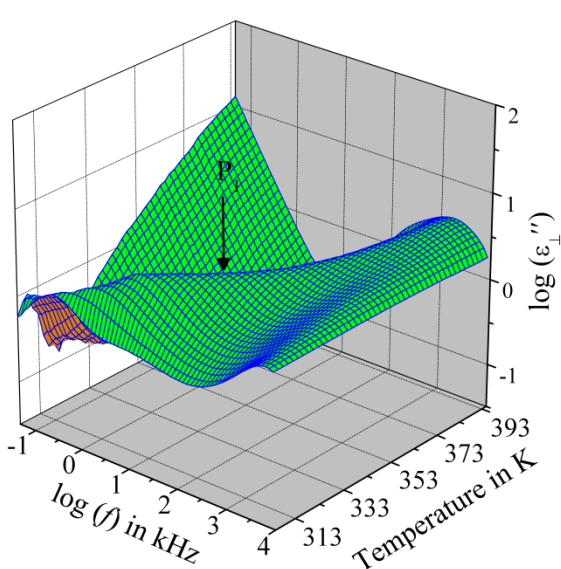

(a)

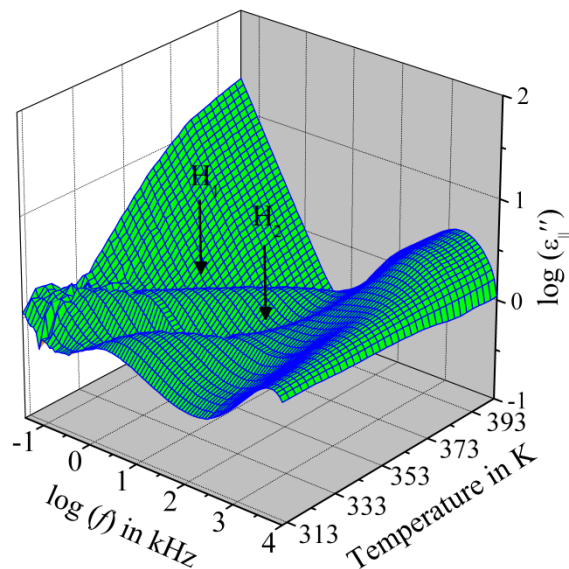

(b)

**Figure S1.** Frequency dependence of the imaginary ( $\epsilon''$ ) parts of the permittivity at different temperatures for compound **1/7**: in (a) HG or planar and (b) HT or homeotropic sample configurations.

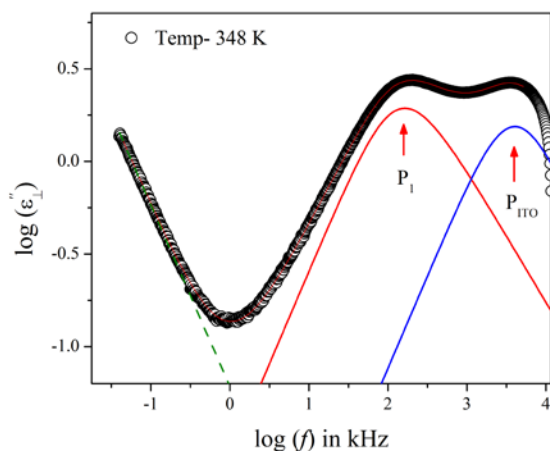

(a)

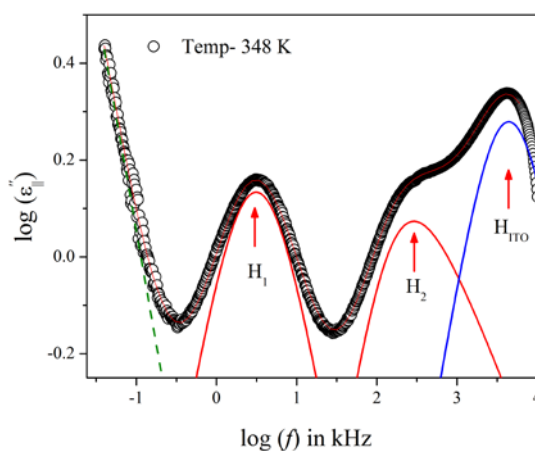

(b)

**Figure S2.** Frequency dependence of imaginary ( $\epsilon''$ ) parts of permittivity for the compound **1/7** at a particular temperature: in (a) HG or planar and (b) HT or homeotropic sample configurations. Solid curves represent different relaxation modes obtained after fit to data points with H-N equation.

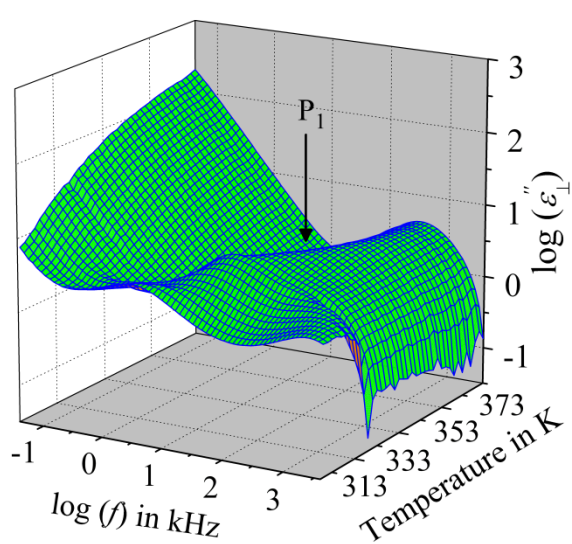

(a)

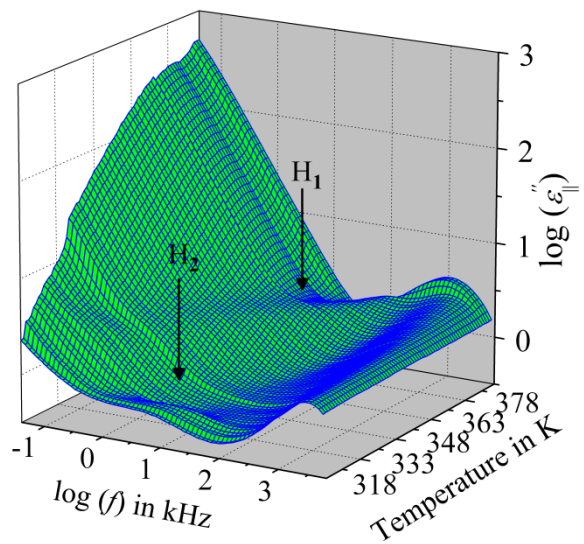

(b)

**Figure S3.** Frequency dependence of the imaginary ( $\epsilon''$ ) parts of the permittivity at different temperatures for compound **1/9**: in (a) HG or planar and (b) HT or homeotropic sample configurations.

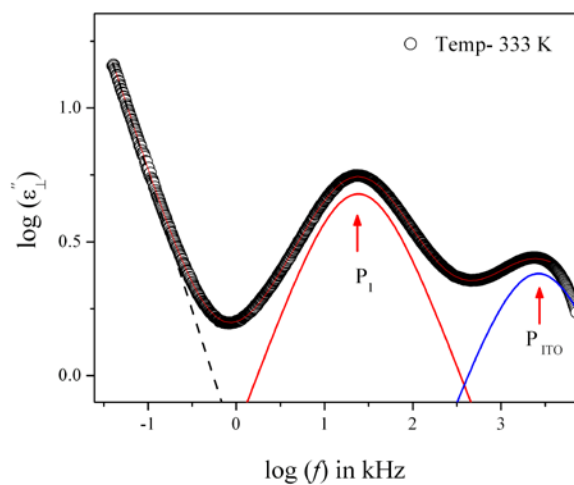

(a)

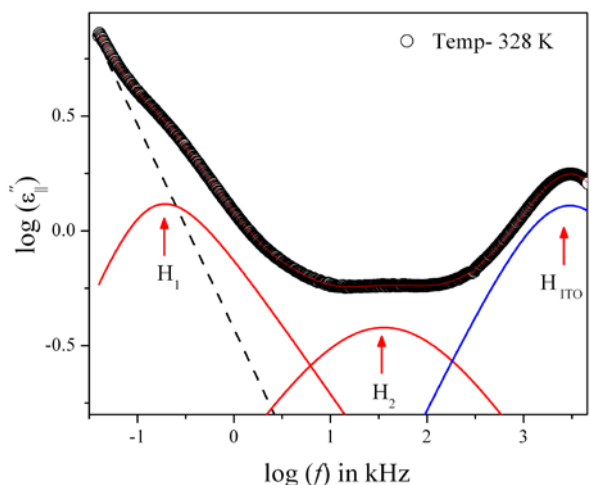

(b)

**Figure S4.** Frequency dependence of imaginary ( $\epsilon''$ ) parts of permittivity for the compound **1/9** at a particular temperature: in (a) HG or planar and (b) HT or homeotropic sample configurations. Solid curves represent different relaxation modes obtained after fit to data points with H-N equation.

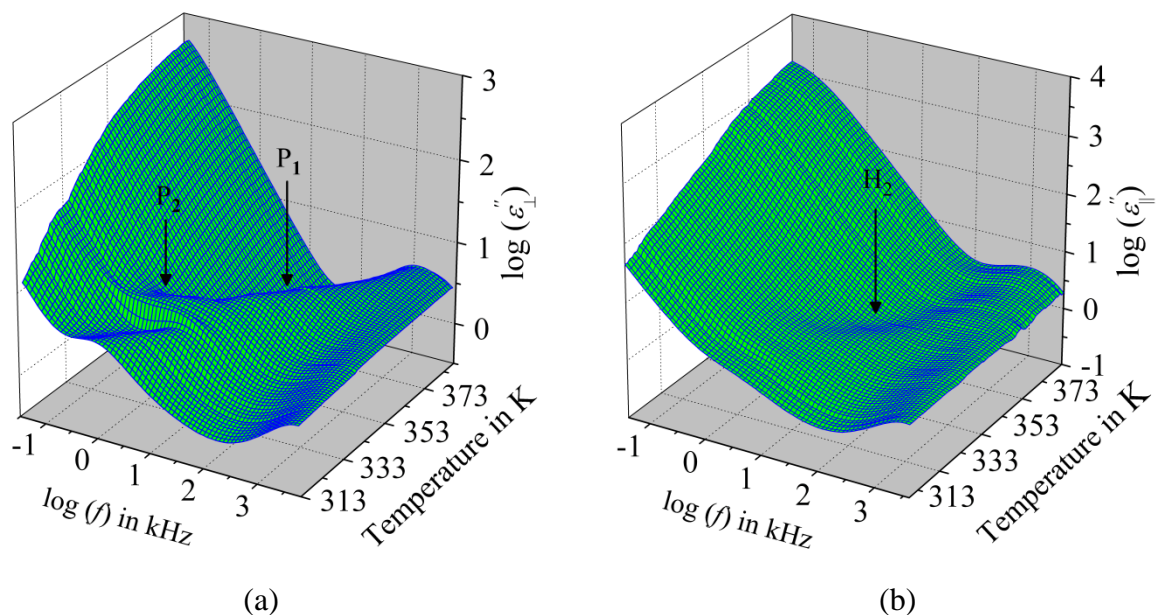

**Figure S5.** Frequency dependence of the imaginary ( $\epsilon''$ ) parts of the complex permittivity at different temperatures for compound **1/10**: in (a) planar and (b) homeotropic oriented samples.

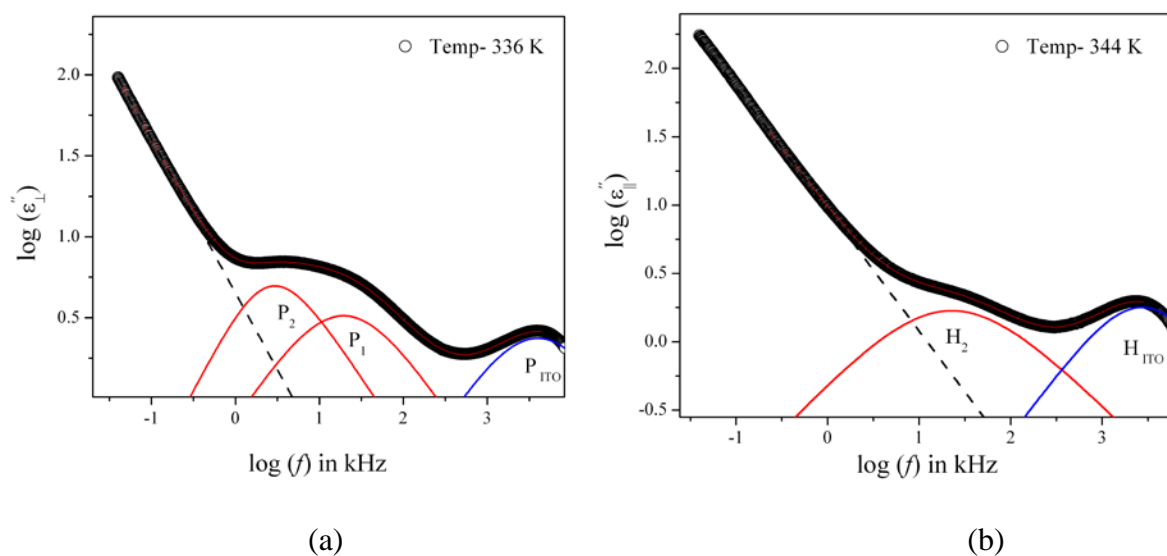

**Figure S6.** Frequency dependence of imaginary ( $\epsilon''$ ) parts of permittivity for the compound **1/10** at a particular temperature: in (a) HG or planar and (b) HT or homeotropic sample configurations. Solid curves represent different relaxation modes obtained after fit to data points with H-N equation.

### 3. Electro-optical study

With an application of an square wave of voltage 180  $V_{pp}$  and frequency 5 Hz, the optical textures were observed in ITO coated cells with planar and homeotropic alignments.

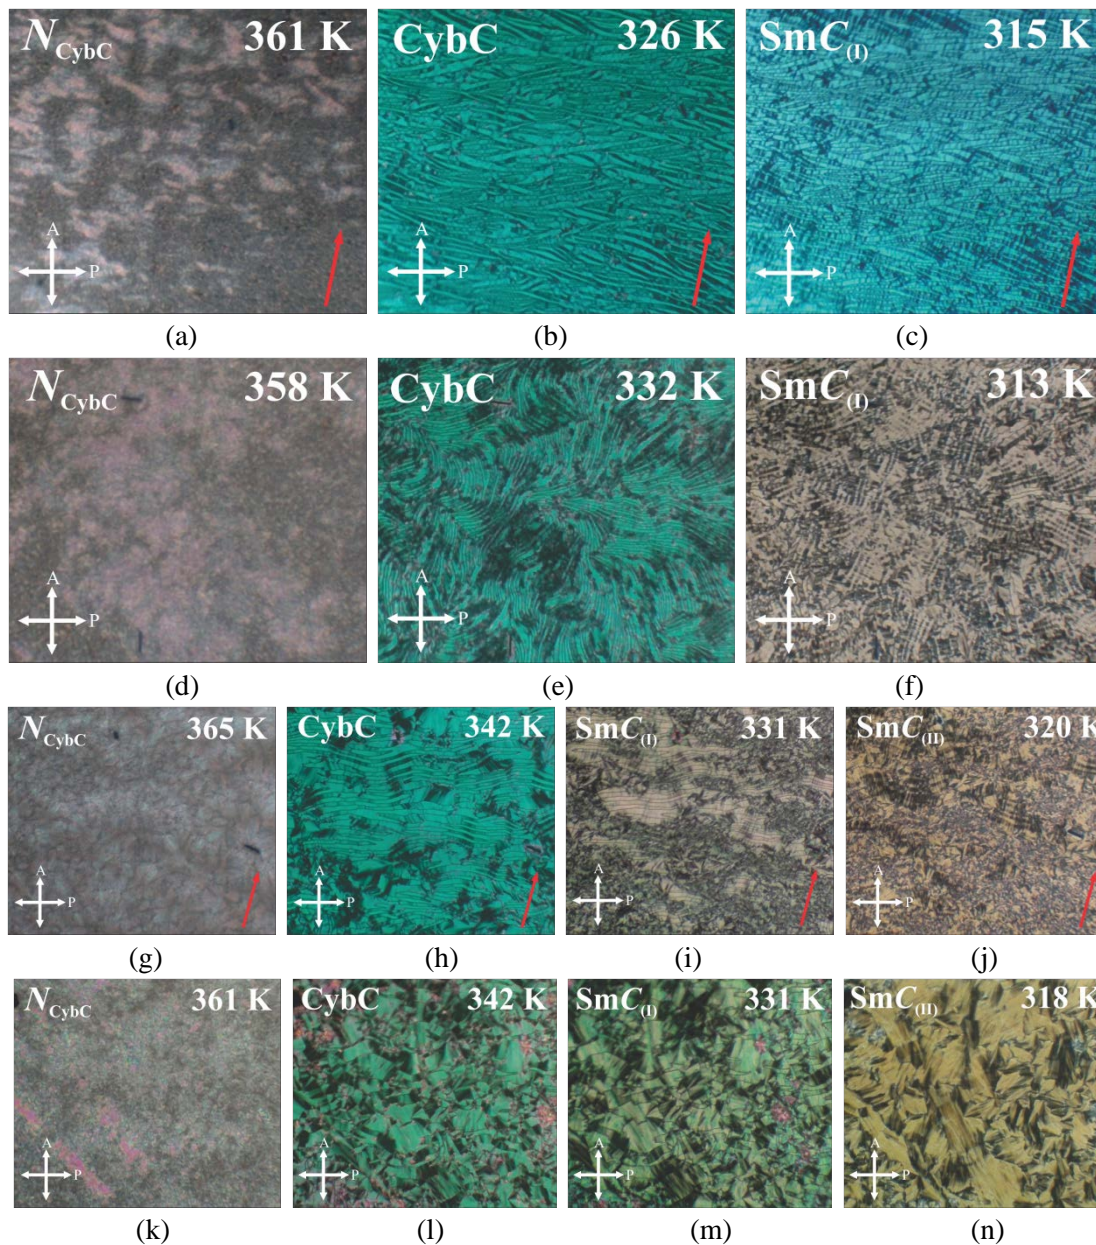

**Figure S7.** Optical textures of the compound **1/9** and **1/10** for an applied square wave AC voltage at different mesophases; (a-c): compound **1/9** in HG cell, (d-f): compound **1/9** in HT cell, (g-j): compound **1/10** in HG cell, (k-n): compound **1/10** in HT cell. Crossed arrows indicate the direction of the analyzer and polarizer. Red arrows define the rubbing direction in planar orientations.
